# Supplementary material for: Monitoring the structure–reactivity relationship in epoxidized perilla and safflower oil thermosetting resins
Source: Royal Society of Chemistry journal article supplement (doi:10.1039/d0py00688b), 2020-01-01
Supplement: d0py00688b1.pdf [file d0py00688b1.pdf]

## Supporting Information

### Monitoring the Structure -Reactivity Relationship on Epoxidized Perilla and Safflower Oils

#### Thermosetting Resins

Thi-Nguyet TRAN,<sup>a</sup> Chiara Di MAURO,<sup>a</sup> Alain GRAILLOT,<sup>b</sup> Alice MIJA<sup>a\*</sup>

<sup>a</sup>Université Côte d'Azur, Institut de Chimie de Nice, UMR CNRS 7272, 28 Avenue Valrose, 06108 Nice Cedex 2, France.

E-mail : Alice.MIJA@univ-cotedazur.fr

<sup>b</sup>Specific Polymers, Parc Via Domitia, 150 Avenue des Cocardières, 34160, Castries, France.

## Table of Contents

|                                                                        |   |
|------------------------------------------------------------------------|---|
| Table 1. FT-IR spectral peak assignments for starting comonomers. .... | 1 |
| Table 2. FT-IR assignments of imidazole initiator. ....                | 2 |
| Table 3. Specifications of three epoxidized vegetable oils. ....       | 2 |

Table 1. FT-IR spectral peak assignments for starting comonomers.

| Monomers | Group                                | Absorption peak (cm <sup>-1</sup> ) |
|----------|--------------------------------------|-------------------------------------|
| EVO      | Methylene (-CH <sub>2</sub> -)       | 2927, 2849                          |
|          | Triglyceride carbonyl of ester (C=O) | 1740                                |
|          | Ether C-O-C, C-C-O                   | 1300-1000                           |
|          | Oxirane ring                         | 3050, 847-823                       |
| DCAs     | Hydroxyl (-O-H) of carboxylic acid   | 3200-2300; 900                      |
|          | Carbonyl of acid (C=O)               | 1674-1676                           |
|          | Cyclic benzene (C=C, C-C)            | 1586, 1560, 736                     |
|          | C-O-C, C-C-O                         | 1300-1000                           |

Table 2. FT-IR assignments of imidazole initiator.

| Wavenumber/ cm-1      | Attribution                           |
|-----------------------|---------------------------------------|
| 3256-2041             | N-H stretching ; C-H stretching       |
| 1667                  | C=N stretching                        |
| 1578                  | C-C stretching                        |
| 1496, 1479,1447, 1325 | C-N stretching                        |
| 1261                  | C-H in-plane-bending                  |
| 12                    | N-H in plane-bending                  |
| 1147, 1100            | C-H in-plane-bending                  |
| 1055, 935             | C-H out-of-plane-bending              |
| 894                   | Ring deformation in-plane-bending     |
| 840                   | N-H out of plane-bending              |
| 827                   | Ring deformation in-plane-bending     |
| 751                   | C-H out-of-plane-bending              |
| 655, 619              | Ring deformation out-of-plane-bending |

Table 3. Specifications of three epoxidized vegetable oils.

|                         | EVO | EPLO | ESFO | ELO |
|-------------------------|-----|------|------|-----|
| Mn (g/mol)              |     | 1227 | 960  | 980 |
| Epoxy content (meq/mol) |     | 8.0  | 3.7  | 5.5 |
